# Supplementary material
Source: PubMed Central journal article supplement (PMC8643345)
Supplement: NIHMS1748329-supplement-1.pdf [file NIHMS1748329-supplement-1.pdf]

**Predicted vitamin D status and colorectal cancer incidence in the Black Women's Health Study**

Lauren E. Barber, Kimberly A. Bertrand, Jessica L. Petrick, Hanna Gerlovin, Laura F. White, Lucile L. Adams-Campbell, Lynn Rosenberg, Hemant K. Roy, Julie R. Palmer

**SUPPLEMENTARY MATERIALS**

**Supplementary Table S1. Predictors included in 25-hydroxyvitamin D [25(OH)D] prediction model in the Black Women's Health Study.**

| Predictors                                           | Beta Coefficients |
|------------------------------------------------------|-------------------|
| Intercept                                            | 11.94             |
| Supplemental vitamin D                               | 9.66              |
| Body mass index (kg/m <sup>2</sup> )                 |                   |
| 25.0-29.9                                            | -2.21             |
| 30.0-34.9                                            | -2.96             |
| ≥35                                                  | -4.71             |
| Multivitamin use                                     | 4.60              |
| Alcohol consumption (drinks/week)                    |                   |
| Current 1-6                                          | -2.28             |
| Current ≥7                                           | -2.96             |
| Postmenopausal hormone use (years)                   |                   |
| Past use for ≥5                                      | 2.70              |
| Current use for <5                                   | 2.39              |
| Current use ≥5                                       | 2.31              |
| Recent use of oral contraceptive, <5 years ago       | 2.58              |
| Oral contraceptive use for ≥10 years                 | 1.60              |
| Vigorous exercise for ≥1 hours/week                  | 1.59              |
| Current cigarette smoking                            | -1.58             |
| Dietary vitamin D intake (kcal-mcg/day) <sup>a</sup> | 0.33              |
| Ultraviolet B radiation flux +160                    | -1.93             |

<sup>a</sup> Energy-adjusted
