# Supplementary material
Source: PubMed Central journal article supplement (PMC8643345)
Supplement: NIHMS1748329-supplement-2.pdf [file NIHMS1748329-supplement-2.pdf]

**Predicted vitamin D status and colorectal cancer incidence in the Black Women's Health Study**

Lauren E. Barber, Kimberly A. Bertrand, Jessica L. Petrick, Hanna Gerlovin, Laura F. White, Lucile L. Adams-Campbell, Lynn Rosenberg, Hemant K. Roy, Julie R. Palmer

**SUPPLEMENTARY MATERIALS**

**Supplementary Table S2. Age- and multivariable-adjusted hazard ratios for the association between predicted vitamin D score, lagged 4 and 10 years, and risk of colorectal cancer.**

| Predicted vitamin D score | Lagged 4 years<br>(n=453) |              |                                       |                                      | Lagged 10 years<br>(n=316) |              |                                       |                                      |
|---------------------------|---------------------------|--------------|---------------------------------------|--------------------------------------|----------------------------|--------------|---------------------------------------|--------------------------------------|
|                           | Cases                     | Person-years | Age-adjusted HR (95% CI) <sup>a</sup> | MV-adjusted HR (95% CI) <sup>b</sup> | Cases                      | Person-years | Age-adjusted HR (95% CI) <sup>a</sup> | MV-adjusted HR (95% CI) <sup>b</sup> |
| Quartile 1 (lowest)       | 132                       | 232015       | 1.44 (1.07-1.93)                      | 1.30 (0.96-1.76)                     | 107                        | 162137       | 1.82 (1.26-2.63)                      | 1.64 (1.13-2.39)                     |
| Quartile 2                | 133                       | 250775       | 1.38 (1.03-1.85)                      | 1.28 (0.95-1.72)                     | 99                         | 173689       | 1.61 (1.11-2.33)                      | 1.50 (1.03-2.18)                     |
| Quartile 3                | 119                       | 253202       | 1.26 (0.93-1.69)                      | 1.19 (0.88-1.61)                     | 71                         | 172983       | 1.20 (0.81-1.78)                      | 1.15 (0.77-1.70)                     |
| Quartile 4 (highest)      | 69                        | 182855       | 1.00 (ref)                            | 1.00 (ref)                           | 39                         | 119787       | 1.00 (ref)                            | 1.00 (ref)                           |
| P-trend                   |                           |              | 0.01                                  | 0.09                                 |                            |              | 0.0002                                | 0.002                                |

<sup>a</sup> Hazard ratios adjusted for age and time period.

<sup>b</sup> Hazard ratios adjusted for age, time period, family history of colorectal cancer, calcium supplementation, aspirin use, and processed meat consumption. HR, Hazard ratio; CI, Confidence interval; MV, Multivariable.
