# Supplementary material
Source: PubMed Central journal article supplement (PMC8643345)
Supplement: NIHMS1748329-supplement-3.pdf [file NIHMS1748329-supplement-3.pdf]

## Predicted vitamin D status and colorectal cancer incidence in the Black Women's Health Study

Lauren E. Barber, Kimberly A. Bertrand, Jessica L. Petrick, Hanna Gerlovin, Laura F. White, Lucile L. Adams-Campbell, Lynn Rosenberg, Hemant K. Roy, Julie R. Palmer

### SUPPLEMENTARY MATERIALS

**Supplementary Table S3. Hazard ratios for the association between predicted vitamin D score and risk of colorectal cancer, using predicted score from baseline in 1995 and predicted score updated every two years, N=49,534.**

|                                                      | Overall colorectal cancer<br>(n=488) |                                          |                                         | Colon cancer<br>(n=370) |                                          |                                      |    | Rectal cancer<br>(n=105) |                                          |                                         |
|------------------------------------------------------|--------------------------------------|------------------------------------------|-----------------------------------------|-------------------------|------------------------------------------|--------------------------------------|----|--------------------------|------------------------------------------|-----------------------------------------|
|                                                      | Cases                                | Age-adjusted<br>HR (95% CI) <sup>a</sup> | MV-adjusted<br>HR (95% CI) <sup>b</sup> | Cases                   | Age-adjusted<br>HR (95% CI) <sup>a</sup> | MV-adjusted<br>(95% CI) <sup>b</sup> | HR | Cases                    | Age-adjusted<br>HR (95% CI) <sup>a</sup> | MV-adjusted<br>HR (95% CI) <sup>b</sup> |
| <b>Predicted vitamin D score at baseline</b>         |                                      |                                          |                                         |                         |                                          |                                      |    |                          |                                          |                                         |
| Quartile 1 (lowest)                                  | 154                                  | 1.32 (1.02-1.71)                         | 1.28 (0.97-1.70)                        | 120                     | 1.33 (0.99-1.79)                         | 1.34 (0.98-1.85)                     |    | 31                       | 1.29 (0.73-2.28)                         | 1.13 (0.62-2.08)                        |
| Quartile 2                                           | 124                                  | 1.09 (0.84-1.43)                         | 1.07 (0.81-1.42)                        | 95                      | 1.10 (0.80-1.49)                         | 1.10 (0.80-1.52)                     |    | 26                       | 1.13 (0.63-2.03)                         | 1.03 (0.56-1.89)                        |
| Quartile 3                                           | 115                                  | 1.06 (0.81-1.39)                         | 1.04 (0.79-1.38)                        | 84                      | 1.02 (0.75-1.41)                         | 1.02 (0.74-1.42)                     |    | 28                       | 1.24 (0.70-2.21)                         | 1.15 (0.64-2.08)                        |
| Quartile 4 (highest)                                 | 95                                   | 1.00 (ref)                               | 1.00 (ref)                              | 71                      | 1.00 (ref)                               | 1.00 (ref)                           |    | 20                       | 1.00 (ref)                               | 1.00 (ref)                              |
| P-trend                                              |                                      | 0.03                                     | 0.10                                    |                         | 0.04                                     | 0.12                                 |    |                          | 0.47                                     | 0.56                                    |
| <b>Predicted vitamin D score updated every cycle</b> |                                      |                                          |                                         |                         |                                          |                                      |    |                          |                                          |                                         |
| Quartile 1 (lowest)                                  | 174                                  | 1.38 (1.09-1.75)                         | 1.24 (0.95-1.61)                        | 134                     | 1.48 (1.12-1.95)                         | 1.30 (0.96-1.77)                     |    | 36                       | 1.20 (0.72-1.99)                         | 1.17 (0.66-2.06)                        |
| Quartile 2                                           | 93                                   | 1.01 (0.77-1.33)                         | 0.93 (0.69-1.24)                        | 75                      | 1.13 (0.83-1.55)                         | 1.02 (0.73-1.43)                     |    | 17                       | 0.78 (0.42-1.44)                         | 0.77 (0.40-1.48)                        |
| Quartile 3                                           | 98                                   | 1.22 (0.93-1.61)                         | 1.15 (0.86-1.52)                        | 72                      | 1.24 (0.90-1.70)                         | 1.15 (0.82-1.60)                     |    | 24                       | 1.27 (0.73-2.23)                         | 1.27 (0.70-2.30)                        |
| Quartile 4 (highest)                                 | 123                                  | 1.00 (ref)                               | 1.00 (ref)                              | 89                      | 1.00 (ref)                               | 1.00 (ref)                           |    | 28                       | 1.00 (ref)                               | 1.00 (ref)                              |
| P-trend                                              |                                      | 0.02                                     | 0.22                                    |                         | 0.01                                     | 0.13                                 |    |                          | 0.78                                     | 0.88                                    |

<sup>a</sup> Hazard ratios adjusted for age and time period.

<sup>b</sup> Hazard ratios adjusted for age, time period, family history of colorectal cancer, calcium supplementation, aspirin use, and processed meat consumption.

HR, Hazard ratio; CI, Confidence interval; MV, Multivariable.
